# Supplementary material for: Assessment of Severe COVID-19 Outcomes Using Measures of Smoking Status and Smoking Intensity
Source: MDPI journal article supplement (doi:10.3390/ijerph18178939), 2021-08-25
Supplement: s1 [file s1]

**Supplementary Table S1:** Characteristics of participants with and without missing data on smoking status

| Characteristics                     | Participants without missing data<br>N (%) | Participants with missing data<br>N (%) | P-value           |
|-------------------------------------|--------------------------------------------|-----------------------------------------|-------------------|
| <b>Older adults (65+ years old)</b> | 1,119 (24.7)                               | 2,277 (5.2)                             | <b>&lt; 0.001</b> |
| <b>Female sex</b>                   | 2,911 (63.1)                               | 8,278 (72.6)                            | <b>&lt; 0.001</b> |
| <b>Race/ethnicity</b>               |                                            |                                         | <b>&lt; 0.001</b> |
| Non-Hispanic White                  | 2,557 (55.5)                               | 7,386 (64.9)                            |                   |
| Non-Hispanic Black                  | 1,526 (33.1)                               | 2,542 (22.3)                            |                   |
| Hispanic                            | 269 (5.8)                                  | 2,71 (2.3)                              |                   |
| Other                               | 259 (5.6)                                  | 1,184 (10.4)                            |                   |
| <b>Smoking</b>                      |                                            |                                         |                   |
| Never                               | 2,815 (61.0)                               | N/A                                     |                   |
| Current                             | 841 (18.2)                                 | N/A                                     |                   |
| Former                              | 955 (20.7)                                 | N/A                                     |                   |
| <b>Comorbidities</b>                |                                            |                                         |                   |
| Obesity                             | 1,010 (21.9)                               | 1,013 (8.8)                             | <b>&lt; 0.001</b> |
| Type 2 diabetes                     | 942 (20.4)                                 | 834 (7.3)                               | <b>&lt; 0.001</b> |
| Asthma                              | 666 (14.4)                                 | 651 (5.7)                               | <b>&lt; 0.001</b> |
| COPD                                | 437 (9.5)                                  | 340 (3.0)                               | <b>&lt; 0.001</b> |
| Hypertension                        | 1,913 (41.5)                               | 1,768 (15.5)                            | <b>&lt; 0.001</b> |
| CKD                                 | 492 (10.7)                                 | 428 (3.8)                               | <b>&lt; 0.001</b> |
| CVD                                 | 1,724 (37.4)                               | 1,605 (14.1)                            | <b>&lt; 0.001</b> |
| Cancer history                      | 1,187 (25.7)                               | 1,196 (10.5)                            | <b>&lt; 0.001</b> |
| <b>Severe COVID-19 outcomes</b>     |                                            |                                         |                   |
| Hospitalization                     | 1,333 (28.9)                               | 966 (8.5)                               | <b>&lt; 0.001</b> |
| ICU admission                       | 450 (9.8)                                  | 271 (2.4)                               | <b>&lt; 0.001</b> |
| Death                               | 66 (1.4)                                   | 67 (0.6)                                | <b>&lt; 0.001</b> |

Abbreviations: COPD: chronic obstructive pulmonary disease; CKD: chronic kidney disease; CVD: cardiovascular disease; ICU: intensive care unit. Bold indicates significant associations,  $p < 0.05$ .
